# Supplementary material for: Time-dependent diffusion MRI for differentiating gliomas from brain metastases and identifying brain metastasis origin
Source: Research Square preprint supplement (doi:10.21203/rs.3.rs-7081146/v1), 2025-07-15
Supplement: Supplementary file 1 [file e06c9df43d597a9cef789732.docx]

**Supplementary Table 1** Sequence parameters of the MRI study protocol

| Sequences | | TR/TE  (msec/ msec) | FOV  (mm2) | matrix size | slice thickness  (mm) | slice gap (mm) | fat suppression | flip angle | scan time |
| --- | --- | --- | --- | --- | --- | --- | --- | --- | --- |
| T2WI | axial | 4500/96 | 220×220 | 305×448 | 5 | 1 | yes | 150° | 1min 39s |
| FLAIR | coronal | 9000/99 | 220×220 | 217×320 | 5 | 1 | yes | 150° | 2min 08s |
| T1WI | axial | 2000/9 | 220×220 | 240×320 | 5 | 1 | yes | 150° | 1min 22s |
| T1WI+C | axial | 180/4.73 | 220×220 | 256×320 | 5 | 1 | yes | 70° | 2min 20s |
| T1WI+C | coronal | 175/4.73 | 220×220 | 208×320 | 5 | 1 | yes | 70° | 1min 14s |
| T1WI+C | sagittal | 175/4.73 | 220×220 | 256×320 | 5 | 1 | yes | 70° | 1min 30s |
| td-dMRI | OGSE_20HZ | 9500/165 | 219×219 | 240×240 | 3 | 2 | yes | - | 3mim 50s |
| OGSE_30HZ | 9500/165 | 219×219 | 240×240 | 3 | 2 | yes | - | 2min 4s |
| PGSE | 6000/165 | 219×219 | 240×240 | 3 | 2 | yes | - | 2min 26s |

td-dMRI, time-dependent diffusion MRI; OGSE, the oscillating gradient spin-echo; PGSE, pulsed gradient spin-echo

**Supplementary Table 2** td-dMRI parameters in differentiation tumor of the ROC analyses

| Parameter | Cut-off value | AUC(95% CI) | Sensitivity (95% CI) | Specificity (95% CI) | Accuracy (95% CI) |
| --- | --- | --- | --- | --- | --- |
| glioma vs. BrM |  |  |  |  |  |
| C_d（μm） | 15.486 | 0.708 (0.614, 0.802) | 0.469 (0.371, 0.568) | 0.886 (0.780, 0.991) | 0.579 (0.575, 0.583) |
| Vin | 0.313 | 0.700 (0.608, 0.702) | 0.480 (0.381, 0.579) | 0.914 (0.822, 1.000) | 0.594 (0.590, 0.598) |
| Dex（μm2/ms） | 1.819 | 0.684(0.587, 0.781) | 0.633 (0.537, 0.728) | 0.714 (0.565, 0.864) | 0.654 (0.651, 0.657) |
| cellularity（μm-1） | 2.542 | 0.636 (0.540, 0.733) | 0.306 (0.215, 0.397) | 0.971 (0.916, 1.000) | 0.481 (0.478, 0.485) |
| IDH-wt glioma vs. lung cancer BrM |  |  |  |  |  |
| C_d（μm） | 15.490 | 0.866 (0.776, 0.955) | 0.732 (0.596, 0.867) | 0.905 (0.779. 1.000) | 0.790 (0.785, 0.796) |
| Vin | 0.309 | 0.822 (0.713, 0.931) | 0.683 (0.540, 0.825) | 0.857 (0.707, 1.000) | 0.742 (0.736, 0.748) |
| Dex（μm2/ms） | 1.681 | 0.742 (0.611, 0.873) | 0.854 (0.745, 0.962) | 0.571 (0.360, 0.783) | 0.758 (0.752, 0.764) |
| IDH-mut glioma vs. lung cancer BrM |  |  |  |  |  |
| C_d（μm） | 14.142 | 0.923 (0.840, 1.000) | 0.976 (0.928, 1.000) | 0.769 (0.540, 0.998) | 0.926 (0.923, 0.928) |
| Vin | 0.315 | 0.906 (0.825, 0.988) | 0.659 (0.513, 0.804) | 1.000 (1.000, 1.000) | 0.741 (0.734, 0.748) |
| Dex（μm2/ms） | 1.785 | 0.807 (0.681, 0.932) | 0.732 (0.596, 0.867) | 0.769 (0.540, 0.998) | 0.741 (0.734, 0.748) |
| breast cancer BrM vs. lung cancer BrM |  |  |  |  |  |
| C_d（μm） | 14.638 | 0.907 (0.852, 0.962) | 0.902 (0.812, 0.993) | 0.719 (0.603, 0.836) | 0.796 (0.793, 0.799) |
| Vin | 0.265 | 0.737 (0.638, 0.836) | 0.927 (0.847, 1.000) | 0.509 (0.379, 0.639) | 0.684 (0.679, 0.688) |

AUC, area under the receiver operating characteristic curve; BrM, brain metastasis; IDH-wt, isocitrate dehydrogenase-wildtype; IDH-mut, isocitrate dehydrogenase-mutant; C_d, mean cell diameter; Vin, volume fraction of the intracellular space; Dex, extracellular diffusivity; ADC, apparent diffusion coefficient
